# Supplementary material for: Tuning the structure of cerium phosphate nanorods
Source: Royal Society of Chemistry journal article supplement (doi:10.1039/d1ce01151k), 2021-01-01
Supplement: d1ce01151k1.pdf [file d1ce01151k1.pdf]

## **Tuning the structure of cerium phosphate nanorods**

**Lisa Allen, Josh A. Davies-Jones\*, Philip R. Davies\*, Sarah King and Padraic O'Reilly**

### **Electronic Supplementary Information**

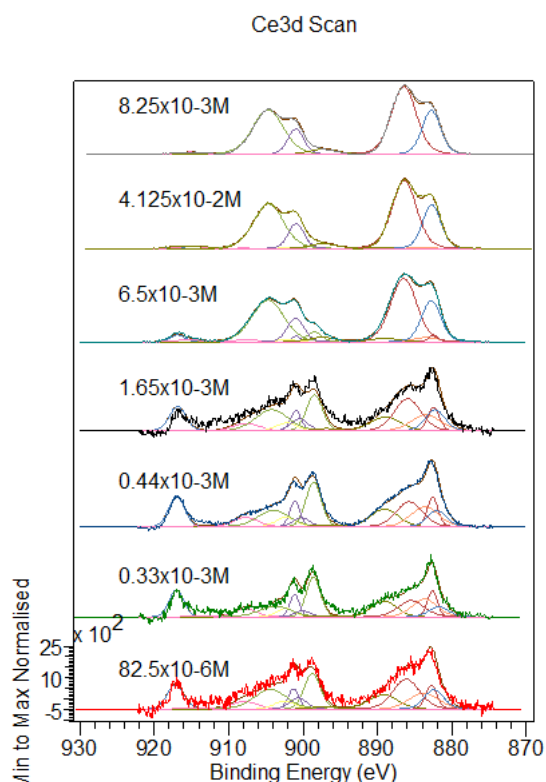

**Figure S1:** XP spectra of cerium phosphate nanoparticles for changing phosphate concentrations. Curve fits use models of Ce(III) and Ce(IV) constructed from spectra of standards.

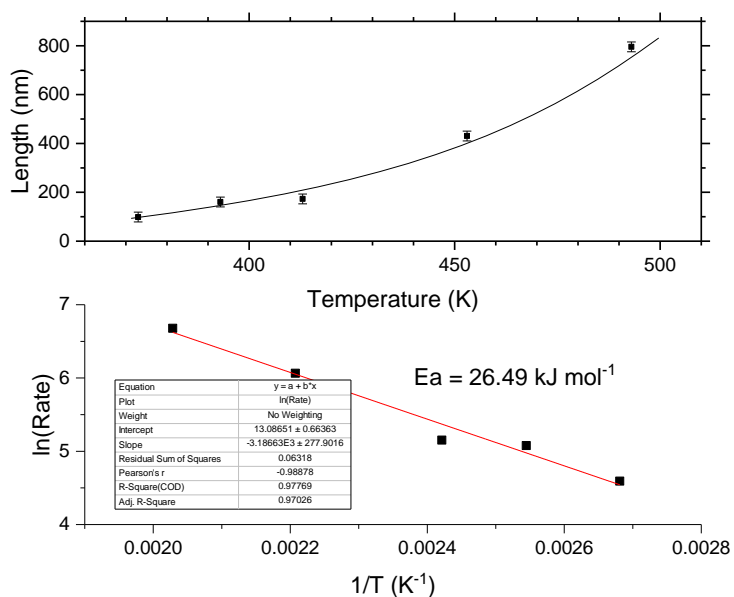

**Figure S2: Top:** Graph of  $\text{CePO}_4$  nanorod length against synthesis temperature. **Bottom:** Arrhenius plot using nanorod length as a measure of rate of growth

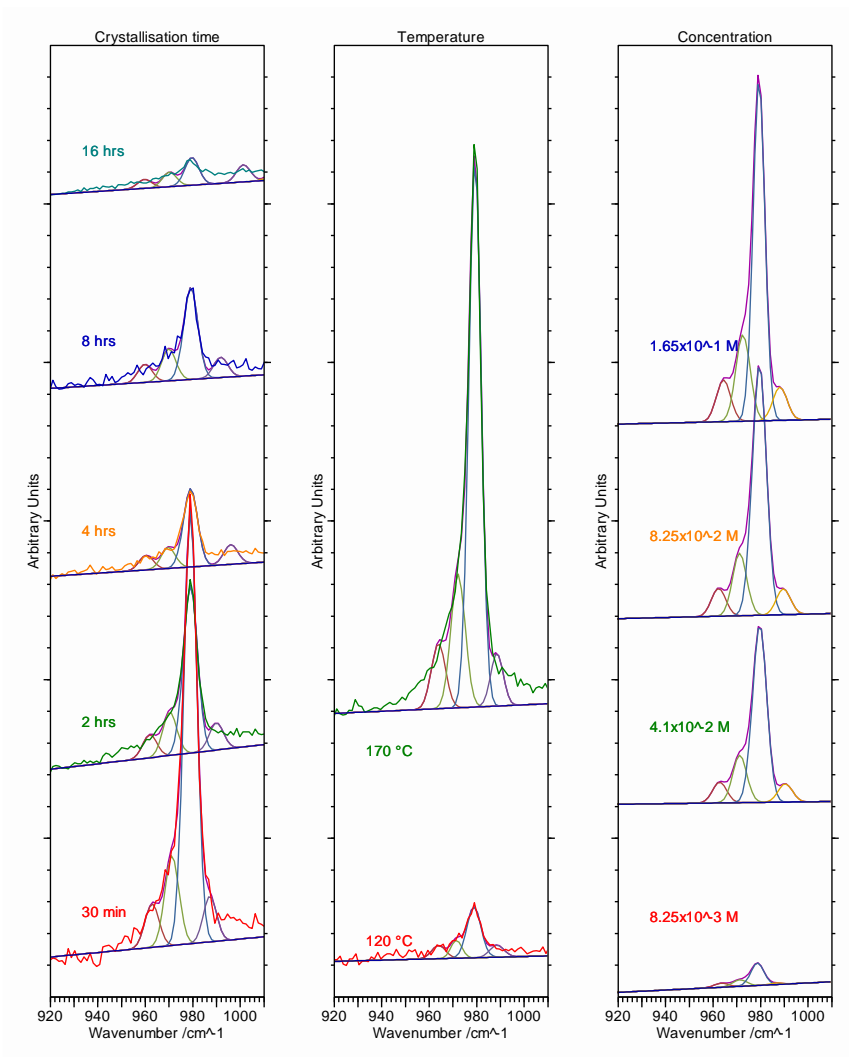

**Figure S3: Raman Spectra of phosphate nanoparticles prepared at different temperatures.**

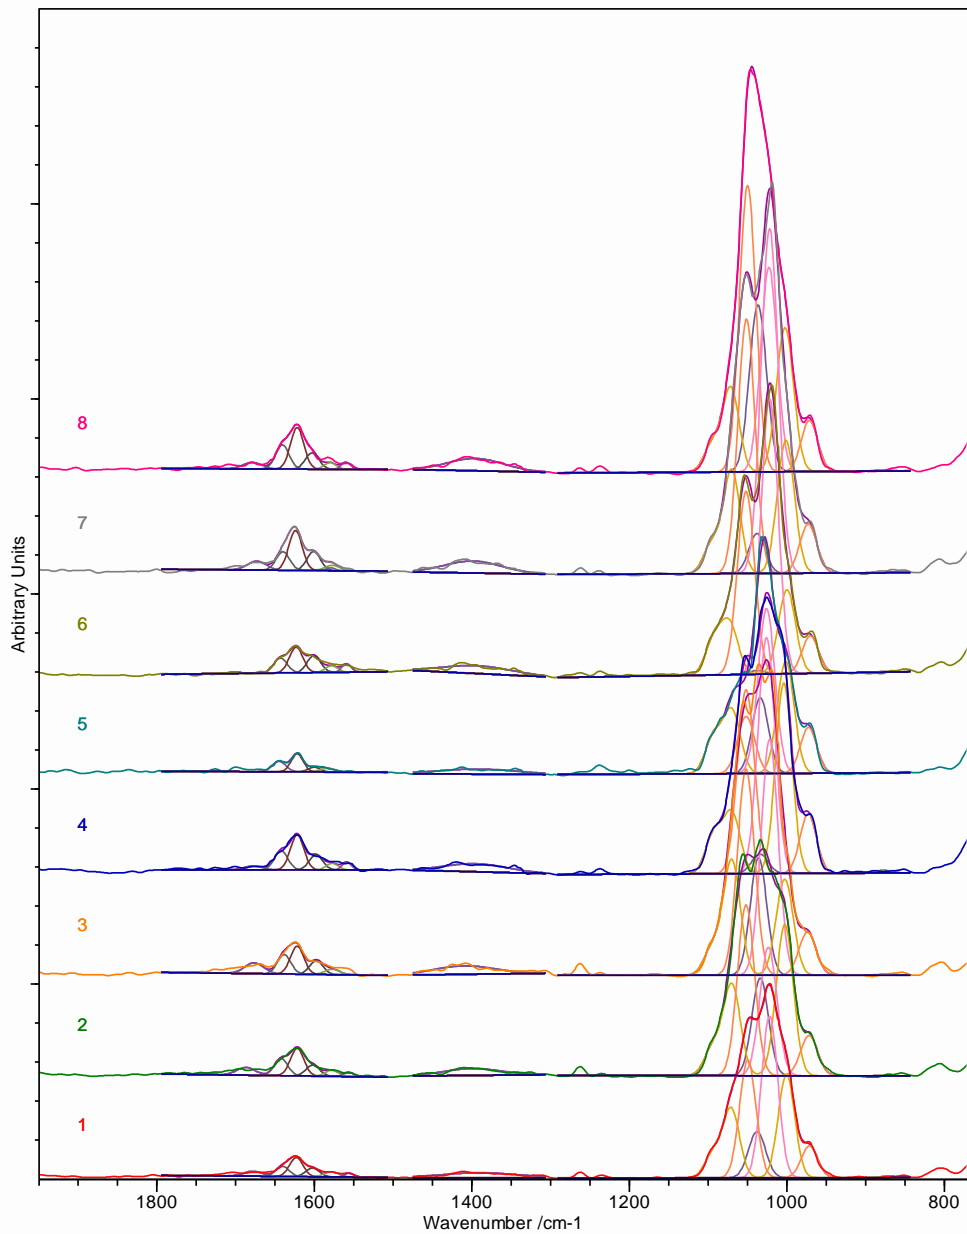

Figure S4: PiFM spectra from Nanorods in Figure 5

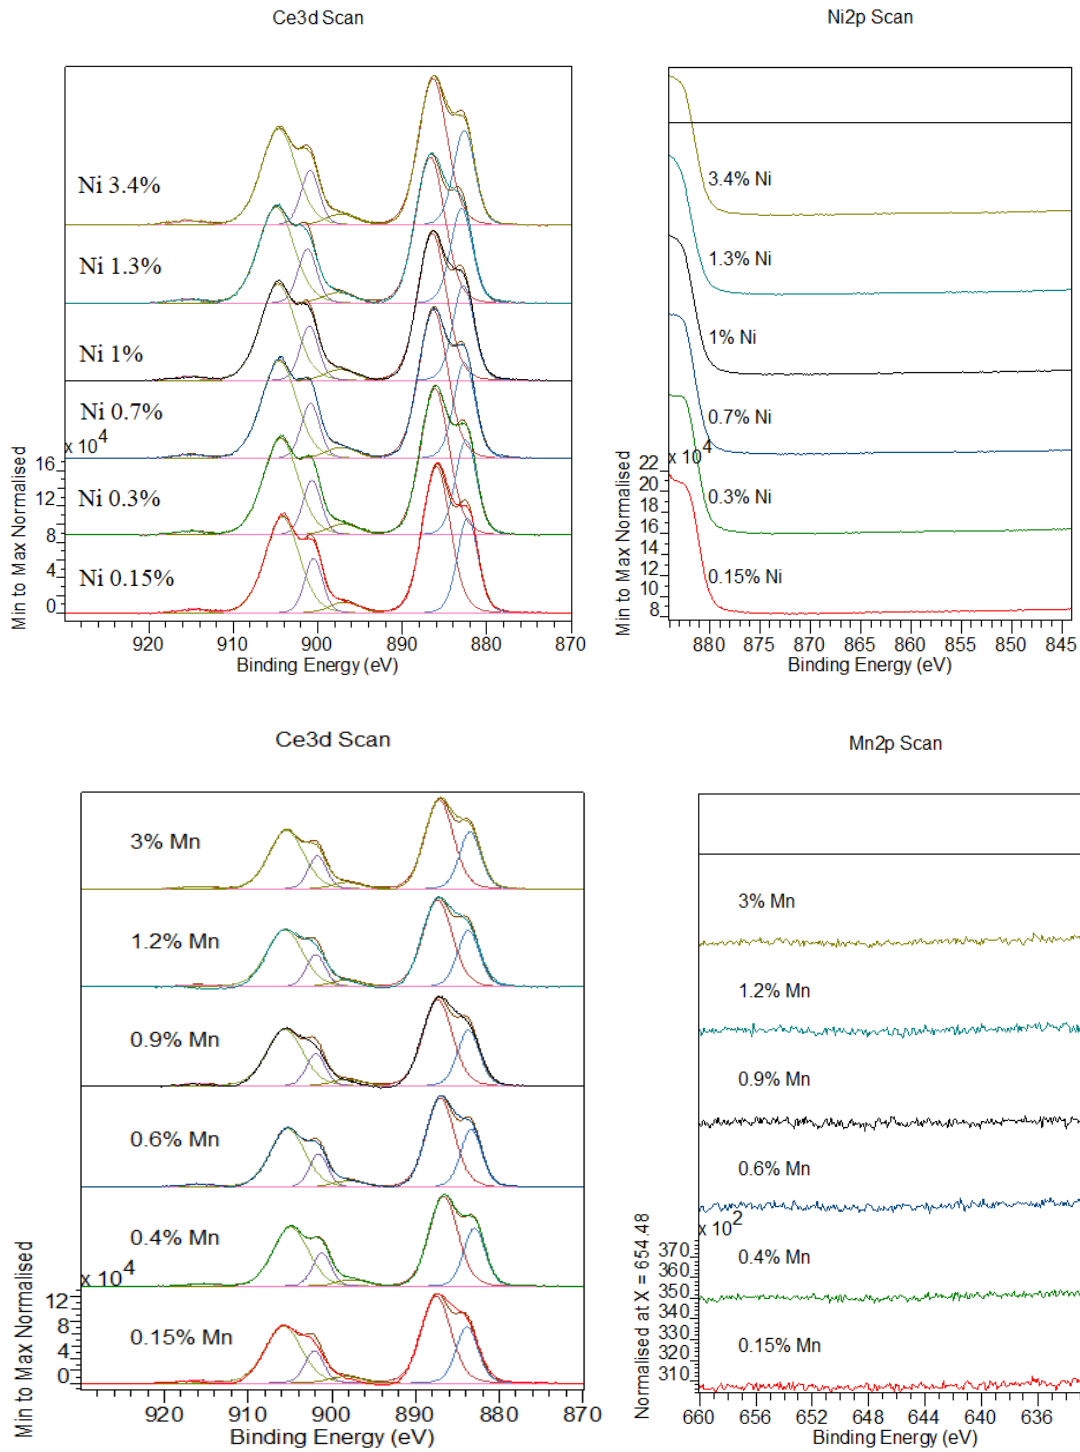

**Figure S5:** XPS spectra of doped cerium phosphate nanoparticles.

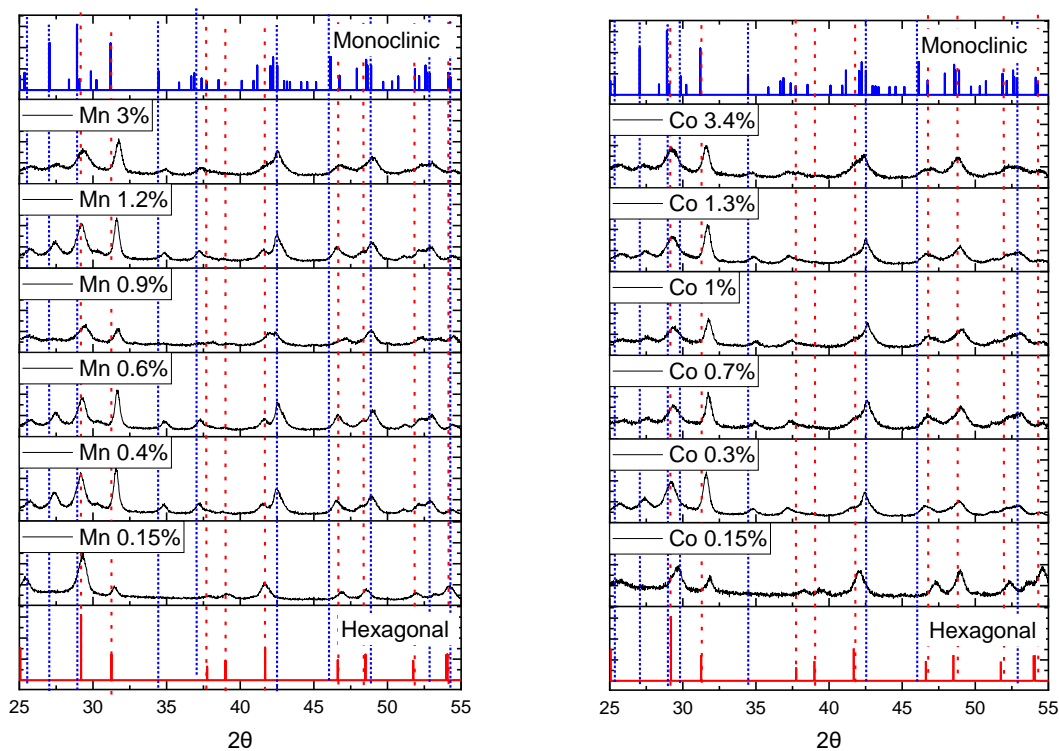

Figure S6. XRD of doped-Cerium nanoparticles prepared at different amounts of Co and Mn with  $8.25 \times 10^{-2}$  M potassium phosphate at 170 °C. With reference samples from the ICDDMS data base for hexagonal and monoclinic  $\text{CePO}_4$ .

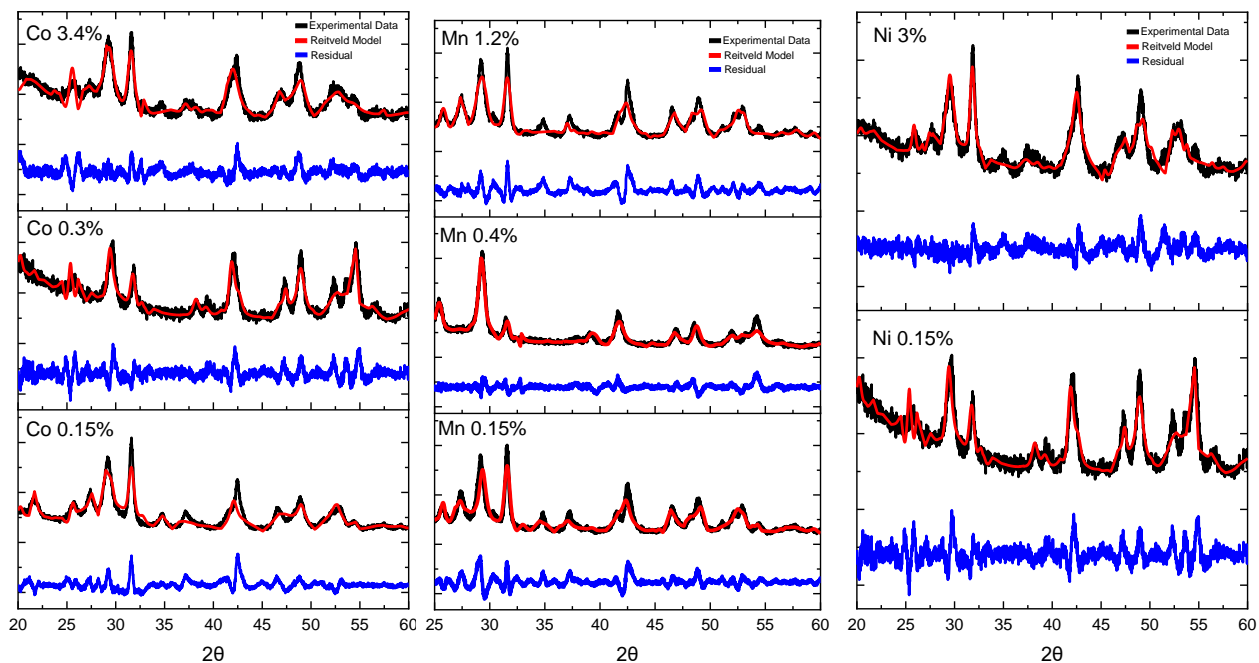

Figure S7: Rietveld analysis

| Element<br>(Doping %) | Hexagonal<br>% | Monoclinic<br>% | Cerium<br>Oxide % | $\chi^2$ | $R_p$ | $R_{wp}$ |
|-----------------------|----------------|-----------------|-------------------|----------|-------|----------|
|-----------------------|----------------|-----------------|-------------------|----------|-------|----------|

|          |       |       |      |      |      |      |
|----------|-------|-------|------|------|------|------|
| Co 0.15% | 98.47 | 1.53  | 0.01 | 1.3  | 11.6 | 14.9 |
| Co 0.3%  | 78.90 | 21.10 | 0.00 | 3.41 | 9.97 | 12.6 |
| Co 0.7%  | 84.23 | 15.77 | 0.00 | 1.57 | 4.92 | 6.28 |
| Co 1.3%  | 79.16 | 19.75 | 1.10 | 2.74 | 6.22 | 8.32 |
| Co 3.4%  | 74.64 | 25.36 | 0.00 | 3.98 | 8.78 | 11.4 |
| Mn 0.15% | 95.63 | 4.18  | 0.19 | 9.7  | 12.2 | 15.2 |
| Mn 0.4%  | 58.23 | 41.77 | 0.00 | 4.21 | 8.56 | 11.6 |
| Mn 0.9%  | 64.85 | 35.15 | 0.00 | 2.71 | 6.19 | 8.31 |
| Mn 1.3%  | 66.04 | 33.96 | 0.00 | 3.37 | 11.5 | 14.5 |
| Mn 3%    | 71.72 | 28.28 | 0.00 | 3.71 | 10.0 | 11.9 |
| Ni 0.15% | 80.49 | 36.49 | 0.00 | 5.02 | 9.66 | 12.6 |
| Ni 0.3%  | 58.14 | 41.86 | 0.00 | 3.49 | 5.80 | 8.04 |
| Ni 0.7%  | 65.17 | 33.51 | 1.31 | 2.13 | 4.66 | 6.17 |
| Ni 1%    | 76.16 | 23.57 | 0.26 | 1.35 | 7.75 | 9.81 |
| Ni 1.3%  | 57.45 | 40.27 | 2.28 | 2.80 | 5.19 | 7.08 |
| Ni 3.4%  | 63.09 | 36.36 | 0.55 | 3.36 | 8.62 | 11.1 |

**Table S1 Results of Rietveld analysis of Mn, Co and Ni doped cerium phosphate nanoparticles using Super Professor.**

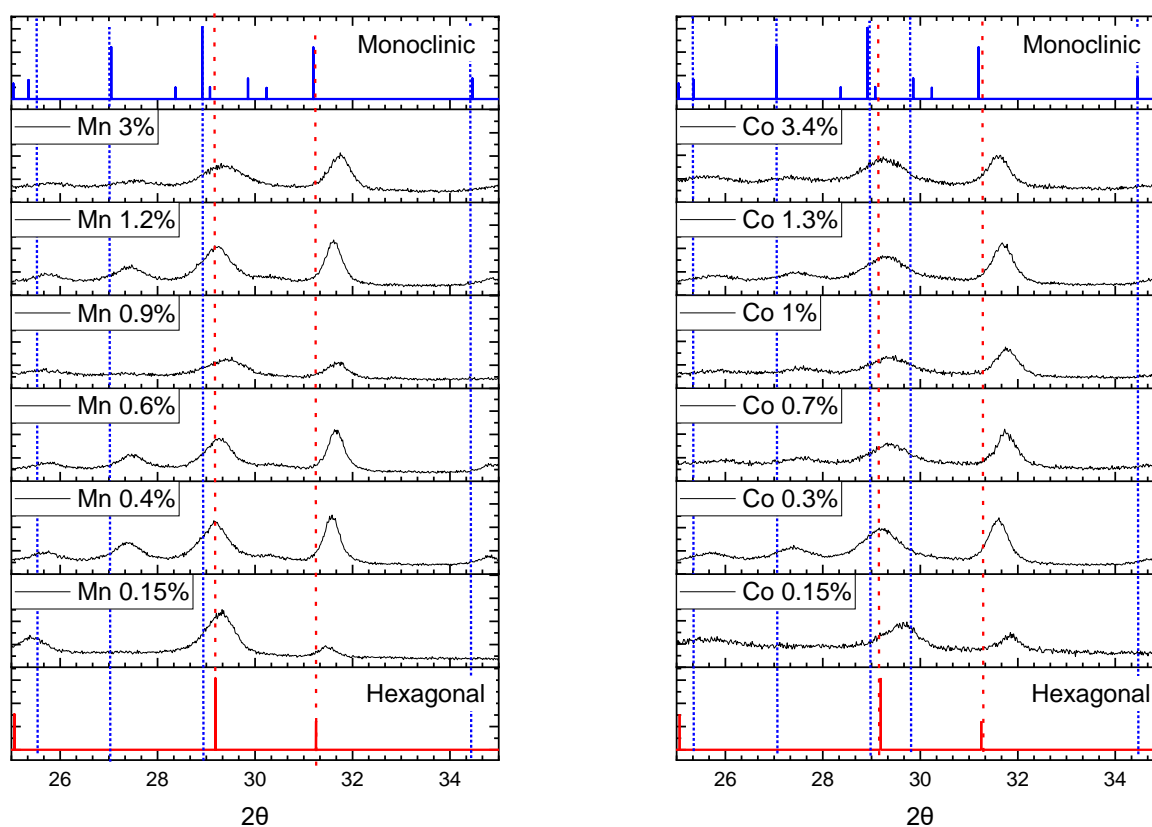

**Figure S8. XRD of doped-Cerium nanoparticles between 27° and 31° prepared at different amounts of Ni, Co and Mn with  $8.25 \times 10^{-2}$  M potassium phosphate at 170 °C. With reference samples from the ICDS data base for hexagonal and monoclinic  $\text{CePO}_4$ .**
